# Supplementary material for: Excess of severe autoimmune diseases in women with premature ovarian insufficiency: a population-based study
Source: PubMed Central journal article supplement — Hum Reprod. 2024 Sep 25;39(11):2601–7. doi: 10.1093/humrep/deae213 (PMC11532604; doi:10.1093/humrep/deae213), 2024-09-25
Supplement: deae213_supplementary_data.pdf [file deae213_supplementary_data.pdf]

**Supplementary Table S1.** ICD (International Statistical Classification of Diseases and Related Health Problems) codes for severe autoimmune diseases used in the study.

|                                                                            | ICD-10                                                                                                  | ICD-9                                                                                                                                                          | ICD-8                                  |
|----------------------------------------------------------------------------|---------------------------------------------------------------------------------------------------------|----------------------------------------------------------------------------------------------------------------------------------------------------------------|----------------------------------------|
| <b>Endocrine disorders</b>                                                 |                                                                                                         |                                                                                                                                                                |                                        |
| Hyperthyroidism                                                            | E05.0, E05.2, E05.5, E05.9, E05.80, E05.81, E05.89#                                                     | 242.00, 242.20, 242.30, 242.80<br>242.81, 242.90                                                                                                               | 242.00, 242.09, 242.10, 242.20         |
| Polyglandular autoimmune disorders (APECED, Schmidt syndrome, unspecified) | E31.0, E31.1, E31.8, E31.9, E31.01, E31.08                                                              | 258.1, 258.8, 258.9, 258.10, 258.98, 258.99                                                                                                                    | 258.10, 258.98, 258.99                 |
| <b>Inflammatory disorders</b>                                              |                                                                                                         |                                                                                                                                                                |                                        |
| Rheumatoid arthritis                                                       | M05.8, M05.9, M06.0, M06.8, M06.9, M08                                                                  | 714.0, 714.2, 714.30, 714.32                                                                                                                                   | 712.00, 712.10, 712.20, 712.38, 712.39 |
| Ankylosing spondylitis                                                     | M45, M08.1                                                                                              | 720                                                                                                                                                            | 712.40                                 |
| Inflammatory bowel diseases (Crohn's disease and colitis ulcerosa)         | K50.0, K50.1, K50.8, K50.9, K51.0, K51.1, K51.2, K51.3, K51.5, K51.8, K51.9                             | 555.0, 555.1, 555.2, 555.9, 556.2, 556.3, 556.5, 556.6, 556.8, 556.9                                                                                           | 563.00, 563.10                         |
| Diabetes type I                                                            | E10                                                                                                     | 250.01, 250.03, 250.11, 250.13, 250.21, 250.23, 250.31, 250.33, 250.41, 250.43, 250.51, 250.53, 250.61, 250.63, 250.71, 250.73, 250.81, 250.83, 250.91, 250.93 | –                                      |
| Addison's disease                                                          | E27.1, 27.2, 27.4                                                                                       | 255.41                                                                                                                                                         | 255.10                                 |
| Sarcoidosis                                                                | D86.0, D86.1, D86.2, D86.3, D86.8, D86.9                                                                | 135                                                                                                                                                            | 135.97, 135.99                         |
| Vasculitis                                                                 | M30.0, M30.1, M30.2, M30.3, M30.8, M31.0, M31.1, M31.2, M31.3, M31.4, M31.5, M31.6, M31.7, M31.8, M31.9 | 446.0, 446.1, 446.3, 446.4, 446.5, 446.6, 446.7, 447.5, 446.20, 446.21, 446.29                                                                                 | 446                                    |
| Systemic lupus erythematosus                                               | M32.8, M32.9                                                                                            | 710.0                                                                                                                                                          | 734.10                                 |
